# Supplementary material for: Post-click labeling enables highly accurate single cell analyses of glucose uptake ex vivo and in vivo
Source: PubMed Central journal article supplement (PMC11021395; doi:10.1038/s42003-024-06164-y), 2024-04-16
Supplement: 42003_2024_6164_MOESM3_ESM.pdf [file 42003_2024_6164_MOESM3_ESM.pdf]

## Description of Additional Supplementary Files

**File name:** Supplementary Data 1

**Description:** The source data behind the graphs in the paper.
